# Supplementary material for: Identification of Three Novel Plasmodium Factors Involved in Ookinete to Oocyst Developmental Transition
Source: PubMed Central journal article supplement (PMC8005625; doi:10.3389/fcimb.2021.634273), 2021-03-15
Supplement: Image_1.pdf [file Image_1.pdf]

## Supplementary Figures

```

PfPIMMS01      M---KLLNNRFVVLCPPIIILFFFLNSVVLGNNNRNNINFHETENAAKAMRKLLSGEINSI 57
PbPIMMS01      MMHFPKYSYTLICIILIFALLF----TIASSYNNEDNKNFNGTENAATAKAIKLLNGEIDTI 56
PyPIMMS01      M-YFPKYSYTLICIILISLLF----TIASSYNNENGNKNFNETENAAKAIKLLNGEIDTI 55
PcPIMMS01      MARFPKYSYILCIILIFALLF----TTAFSYNNGDNKNFNETENAAKAIKLLNGEIDTI 56
PkPIMMS01      M-----YFLHNIICPVRSYCYTGRKEHEQSRICETENAAAIRKLLNGEIDTI 48
PvPIMMS01      M---KLLSASPCTLYIT-LLFVLLVHVTVGGKHMNNQDFAETEQAARAIKLLNGEIDTI 56
Consensus          :::          . :. : : **:**:*:****.***:*

PfPIMMS01      KLDNGDELKIKLNDEKHKDSTKWD--KSYSFISNLLEEKYSQTDLFRKKQEINEANTKII 115
PbPIMMS01      KLENGDELKTKSSNIQGD-----YSWKNNRRL----- 85
PyPIMMS01      KLENGDELKIKSSNIQED-----YSWKNNRQL----- 84
PcPIMMS01      KLENGDELKIRSDSSIQDD-----YSWQNNRRL----- 85
PkPIMMS01      KLENGNELKIRPRDEKYDAHKRYNDETNYSFIDNSEEEN-VQTDLLRKN-ESVEVGRKI- 105
PvPIMMS01      KLENGNKLKIRSDSEKDDAHKRHNDKTNYSFIDNSEEEN-VQTNLLRKN-ETVDAGSKIV 114
Consensus          **:***:** : ..          **: .* .

PfPIMMS01      EDRQEFYILNNDIEIENIATRFVLENNFDELYIQSFKQSLIDI IQSLNN 163
PbPIMMS01      ----- 85
PyPIMMS01      ----- 84
PcPIMMS01      ----- 85
PkPIMMS01      DEQENFHTLDNESTESHKQISHGNKFHESETEAFAQNLKDIIRSLNN 153
PvPIMMS01      EDQEDFYILDNESIEAIANKISMENKFHEFEAEFAQSLKDIIRSLNN 162
Consensus

```

**Figure S1. Multiple sequence alignment of *Plasmodium* PIMMS01 orthologues**

Sequence alignment of PIMMS01 orthologs in six *Plasmodium* species: *P. falciparum* (PfPIMMS01; PF3D7\_0112100), *P. berghei* (PbPIMMS01; PBANKA\_0201700), *P. yoelii* (PyPIMMS01; PYYM\_0204600), *P. chabaudi* (PcPIMMS01; PCHAS\_0200100), *P. knowlesi* (PkPIMMS01; PKNH\_0201500) and *P. vivax* (PvPIMMS01; PVX\_081200). In the consensus sequence, dots and colons mark conserved amino acid residues with weakly and strongly similar properties, respectively, and asterisks mark amino acid residues that are identical between orthologues. Predicted signal peptides are highlighted in grey.

**Pf**PIIMMS57 M-GKCDFFIFL-PIFFFVLIVYVHVVLGQPSDVPNVRDLIKRFENSNEVSNNSNNIFNRRN 58  
**Pb**PIIMMS57 MTRNLFFFIYY-HAVIFMIFWKFNGKGGDEQKRNVKDLIRRYESINNSN----- 49  
**Py**PIIMMS57 MKRNLFFFIYY-HAAIFMVFWKFNGKGGNEKKNVKDLIRRYESINNSNDLNNSSSSSS 59  
**Pc**PIIMMS57 MKRNLFFFIYC-HAAICIVFWKFNGHNGNEKKNVKDLIRRYETINNPDLNNSSSTSA 59  
**Pk**PIIMMS57 MLPKCILSIYIISCVLLLLLWIKIGDVNGQLPRRGVNEELIRRFENQSTEDRQQRDSNEN- 59  
**Pv**PIIMMS57 MVPKCIFSIYATFCALLLLSWNIGDVKGQPPKRGVRNDLIKWFHGGSEDTQRDSNEN- 59  
Consensus : : \* : : : \* . . . \* : : \* .

**Pf**PIIMMS57 NQLERNIHYDPNNLYNIRQN--PRHENIAGRSYVSRNPNEFSSD-----IMIN 104  
**Pb**PIIMMS57 ---DSNYE-DRDNAPNRRQNV-AFDDQKPSTSYANRNDKQYGRMMKKNANNDGNNMAN 104  
**Py**PIIMMS57 DLTDNYE-DRDNAPNRRQNV-AFDDQPPSTSYANRNNNGQYGRMMKGNANNDGNNMIN 117  
**Pc**PIIMMS57 ESTGAPYE-NRDP I PYRGQNA-PIDDDQPPSTSYANRSNESQYMRMDMPN----- 106  
**Pk**PIIMMS57 KSFESGSQ-GIEHPLNKGQNTTIYEEPPQPGQSYEPARRS-SSF-----PTQKSSLN 108  
**Pv**PIIMMS57 KSFQSGSQ-GWEQPLNRGQNTSIYDEQQPGTSGYGPVRRSSASL-----PTEKRSFS 109  
Consensus . . : \*\* . : . \*\*

**Pf**PIIMMS57 RNNVHDEQRVRD-----EGRE-----NN 122  
**Pb**PIIMMS57 DEDYDDD-NSKSEKFNYHEPSNN---YRGNNNYMYSNTQIP-----MYSNKSPLY 152  
**Py**PIIMMS57 DEDYDDDDSDSEEFNYQEPSNN---YRGNNNYMHNSNSQTP-----MYANKSYLY 166  
**Pc**PIIMMS57 TEDYDD-DDSDSDEFYSYSQISNN---NRGNNNYMYSNSQVP-----RHGNKSSLS 154  
**Pk**PIIMMS57 VDDYSDVSDDEDNDYAS-NTRNDYKRDHRIGQQHQ-----RG 144  
**Pv**PIIMMS57 VDDYSEDDSDDEDNDYGG-NLGDYPRDYRNDQQHQYGSSHQMRQTYDQAEEDDRDSIKHG 168  
Consensus :: : . . .

**Pf**PIIMMS57 RRSSVPNNAHTSAKYGSDQEI MQNPKVNNLHLGKSLDDFYNNLGVSSDDFEDDEQVNYN 182  
**Pb**PIIMMS57 SNFRDPNENHSENYGD-----QYSPQNSPNYLDRSFDDFRNKLGLSSEDFSRRETETYSN 207  
**Py**PIIMMS57 SNFRDPNENQPSSENYDD-----QYSPQNNPPYLGRSFDNFRNRLGLNTEDFSRGTETYSN 221  
**Pc**PIIMMS57 NNRRDPNENSPSGKYGD-----QDSSQNNAPYLGRSFDNFRNKLGLSSEDFSRDSEYYSN 209  
**Pk**PIIMMS57 NRDGFPDEEPPRREEGG-----RMT-PKGNTYLGNDFEHFNKRLGLSMDDYMSDTEDDSF 198  
**Pv**PIIMMS57 NRDGYPDEGPPRREEGG-----RMT-PGNVYLGKDFEHFNKRLGLSMDDYMSDKEDDSM 222  
Consensus . \* : : . . . : \* . . . \* : \* : : :

**Pf**PIIMMS57 END---AFSSFSHNNQNDTTLTYDEFYVDSNNYTRNGSSSSSNNNNNNNNIGNNGK 238  
**Pb**PIIMMS57 TTNKRNT-----GLDNDLNSFVTDDIQYTKYESTENP-----INSSNRDRDSGMR-- 252  
**Py**PIIMMS57 TTNKRNT-----GLNNDSDSFTDDIQYTKYESSSEN-----INSSRQRHDSGMR-- 266  
**Pc**PIIMMS57 TNNRNT-----GLNDEFNTP IADDIQYTKYENSENS-----NNSTRNRDRDSGMR-- 254  
**Pk**PIIMMS57 DSSDNSDDLPRNKLNAHDTDSSSIYEDIQFVRHRDNRQP-----NDDVQFSRTDGRR-- 250  
**Pv**PIIMMS57 GSSNNSDDLRSNESNAYDADQSSIYEDIQFVKRRNRQP-----NKHVQLSKTDGRR-- 274  
Consensus .. : : : : : . . . . \*

**Pf**PIIMMS57 ITYENENDVSYNDSNNGNSTLSNIHRDNKIKPNLS-----SLYGNKTFNNYSNST----- 287  
**Pb**PIIMMS57 ---QSPNNEYNDRNNNG--NRRNSNMYINPNEYDDTYTNSYGYNSQNKINSYVMRYG 307  
**Py**PIIMMS57 ---QSPNNEYNDRNNN-S--NRRNSNMYINTDEDDDSYNSPYGYNQNGPNASQVMRYR 320  
**Pc**PIIMMS57 ---QSPSNEYNRRNNN-----NINSNTYNNPDEDDDSYFNPGYNSQSSSSSSQLMEHG 306  
**Pk**PIIMMS57 ---NAM---YNRSDNGAEESPPRESKRV--NNLSSDVYDYAYGRNGSNMSEPAN-LYSYP 301  
**Pv**PIIMMS57 ---NAI---YRSGSDEEAPHSESEIV--RDPSSVYDYAYGRNGPNRSAPLN-LYSYP 325  
Consensus : \* . . . . : \*\* : . .

**Pf**PIIMMS57 FNDVSNYNRDDEITPFNNRNVYVPSEYSNPLD-AYVHPNNQFSTQYQYGNMMEEMNKL 346  
**Pb**PIIMMS57 LGGNDNIDQ-Q-----TIYSNP--IDYTSSNN-----NYSSSFGGNIKP 344  
**Py**PIIMMS57 LNSDDSDIDQ-Q-----SIYSNP--IDDISTSD-----NYSLNFGGKKS 357  
**Pc**PIIMMS57 LNSGSGSIDQ-R-----SVYSNP--LEYMSPNV-----DYRPSFEGRIK 343  
**Pk**PIIMMS57 ---EDDISQ-RTIPPIENRK---SRNRSSPLQDDYSIPSD-----TYRNSYDSE--- 344  
**Pv**PIIMMS57 ---EEDFNR-RTSPPVGSKK---SMSSSSPLQDDYIKPLD-----SYSDSHDSM--- 368  
Consensus . . . : . \* . \* . \*

PfPIMMS57 RRVNF APRDIYTVNNSL-----DG---HSINNNTPLNND-AGPS 383  
PbPIMMS57 -RNIQHIENDNSSILNSQRDYEDSDRNS-S--RY----GDNRSNRQNKSPIRNID----- 391  
PyPIMMS57 -RSIQHIENDNSSILNSQRNYEDIDNNS-S--RN----GDNRSKIQNKPSIRIFD----- 404  
PcPIMMS57 -RNIQPIEDDNYNMLNSPRHYEDIDSTS-S--GN----NSNRNSRNKPPIRSVD----- 390  
PkJIMMS57 -----DHIYSVIPGEEQYEDINQRRTQGYSSLGNGARPDRNEILPVRGIKKSASS 396  
PvPIMMS57 -----NHLYDVIPGEEQYEDINRRRTPRYNSFDNAVHLDRSELLPVRGVKKSASS 420  
Consensus . : . . . : : ..

PfPIMMS57 YMTEGKKNVNKNININTNTNTNTNTNTNTNTNTNTNTNKSKKRSDSNFFSKNKNNNSA 443  
PbPIMMS57 ---RGNKGDA-----QNRSKRVAHANSI 411  
PyPIMMS57 ---RGNKGDA-----QNKSKRLSYSNSN 424  
PcPIMMS57 ---RSGKGDA-----QNRSSFRMSRSNSD 410  
PkJIMMS57 YHPEGRESKT-----DGSLKKVRKNNKE 419  
PvPIMMS57 YQPEGGKGM-----DNFFNKFRKSKRV 443  
Consensus . \* : . . . : :

PfPIMMS57 STNE-----L-SRYKDVSKKIFKDNMYNRYENKNYPQSVYVFNEYQNNFF FNKILKRS- 495  
PbPIMMS57 PI-----LHRKYDEERQ---PTAHSTITNKILASYIDIYTAQQRNIFYNKNTRVE- 458  
PyPIMMS57 PI-----LNKNYE-PRQ---PITRNSTSNKILASYIDIYTAQQRNIFYNKNTRVE- 470  
PcPIMMS57 PT-----VNKSYGEARQ---SAPRAQTNKILESIEYIETHQRNIFYNKIIRVE- 457  
PkJIMMS57 D-----SSTVMHTQ---QGSKNDNRVSKPLSIITLFSTYQRNLFLNKYSKSSG 464  
PvPIMMS57 DMPKGVSPASQGVNSAHTQ---RGPKDGRQGSKSPSVLTTFTTYQRDLFLRKYSKVGG 499  
Consensus : . . : : \* : \* . \* :

PfPIMMS57 -----SSNSIKQIFQKNTQHKNTNNVSVTSELQVATQHCISTNKNKLTKPVIL 544  
PbPIMMS57 -----KSPIKNFFKMS---NSNDKII SVTEELLNSSKQCI IKNINKLNTNEVLL 503  
PyPIMMS57 -----KSPIKFFKMN---NSNDKII SVTEELLNSSKQCIVNNINKLNTNDVLL 515  
PcPIMMS57 -----RSPVKQFFKMR---NSNDKMISVTEELLNSSKQCIVKNINKLNRDVL 502  
PkJIMMS57 KVGGNVNA--GRTGVKRLFVFSR--SGKDSGLSIMGELQTAVEQCIVKNSNKLRLVLM 520  
PvPIMMS57 GSGGMGGSNASSRGVRL--FSR--SGKDDQGSITGELQTAAEQCIAKNRSKLSRPVLM 555  
Consensus : : . . . . \* : \*\* : : \*\* . \* . \* . : :

PfPIMMS57 KYIALNKKYLNKYEYAMSIIHFTCNKNKNNKSNMCLDIKPMLYENDKNI SADMINRLPN 604  
PbPIMMS57 KNLALNNTNMIKNEYQAVSIVVFNKIKN---REHLDIKSVPYNYSEAYVENS SVILPN 560  
PyPIMMS57 KNLALNNTNMIKNEYQAVSIVVFNKIKN---KESHLDIKSVPYKYSELHVENSS TILPN 572  
PcPIMMS57 KNLALNNTNMIKNEYQTVSIVVNSKYKN---TELHLNIKVPYKYSEVHVENSS TMLPN 559  
PkJIMMS57 KNLAFNDSKLLENYEVAVSIRNKNNG---SATCLDIRPMVYREDDPDASSIVTSLPN 576  
PvPIMMS57 KNLAFNDPKLLKNYEVAVSISDNCKNG---NAACLDIRPMIYREDDPDASIVTSLPN 611  
Consensus \* : \* : : : : : \* : \* : : : \* : : \* : \* :

PfPIMMS57 VYILNNTIEYILTDPKTSYKSLIKNNIKNHLLTVTDIVLILSNNYFKN-INSILVNHYI 663  
PbPIMMS57 MYILNTYEFMLSNQRICGKFRTI IKNKKRDNNLKPVDVVLMLSLFDYIKN-MNPILVSNLM 619  
PyPIMMS57 MYILNTYEFMLSNQRICGFRTI IKNKKRDNNLKPVDVVLMLSLFDYIKN-MNPILVSNLI 631  
PcPIMMS57 MYILNTYEFMLSNQRMCCKFRTI IKNKKRDNNLKPVDVVLMLSLFDYIKN-VSPRFVSNLM 618  
PkJIMMS57 IYILSTYEFLLTNRMCGLPTMVKNRVKENKLTPTDIVLLLSGAYFKSWMNNTLVKHLI 636  
PvPIMMS57 IYILSTYEFLLTNRMCGLPTMVKNRVKENKLTPTDIVLLLSGAYFKSWMNNTLVKHLI 671  
Consensus : \* \* . \* \* : : : : : : : : : : \* . \* \* : : : : \* : : :

PfPIMMS57 SFLNTHKNETYLLKYLSALISVFPFKPAMKIYYDQR-YINLSLYTLNLEIAKVFNGLLN 722  
PbPIMMS57 QFIKTKQSIYMKKYFNIMVALIPFKPALKIYYGEKIYKDLTTYKIQSEIKNIFDELLL 679  
PyPIMMS57 KFIKTKQSIYMKKYFNTMVALIPFKPALKIYYGESIYKDLTTYKMQSEIKNIFDELLL 691  
PcPIMMS57 QFIKTKQSIYMKKYFDTMVALIPFKPALKIYYGEKMYNDLTTYKIQSEIKSIFDELLL 678  
PkJIMMS57 SFLKTRVYLYEKYFLAVLISLSSFIPALKIYFGER-YAKVSAHNLDAEVNKMIPEMLG 695  
PvPIMMS57 AFLTTKRVIHLEKYFLAVLISFAPFKPALKMYFGER-YAKLSAYSLDVEVNKMVGEMLG 730  
Consensus \* : \* \* . : : \* : : : : \* \* \* : \* : : : : \* : . . : \*

```

PfPIMMS57      VILKWSQAFKNEKHNKHTNQIVIQMYKNLSSFSHNRIPNLGHMFKSLEVILRYQRIYNDIK 782
PbPIMMS57      ISIKWAQAFKDKYSATDNKVIDLDMHRTISEFSTSKTRTLSTKTFVSLLENILYKELITSDMI 739
PyPIMMS57      ISIKWAQAFKDKYSANDNKIILDMHQTIKSFSTSKTRTLSTKTFVSLLENILYKELITNDIV 751
PcPIMMS57      ISLKWAQAFKDKYSSADNKIILDMHRTISEFSTSKTKTLSTTFVSLLENILYKELISNDMI 738
PkPIMMS57      AALRWTQAFQEKFSDESNRILLNVHKTSLASYSKERNRGLSRKFRLEALLLRQKVASDVV 755
PvPIMMS57      VALRWTQAFQEKFSDESNRVLLQVHRRLLAAYSRSRNGGLTGKFRTLQELLRQKVASDVT 790
Consensus      :*:***::: . *:::~::~: :~:~* :~: * * :~:~* :~: :~:~*~:

PfPIMMS57      KGKEDYEYEVMIQYFTKYVRNVYAKTITS----- 810
PbPIMMS57      DNKDDNQKVLISYIVKCFRNIYYTTFYMMSNKRTY 774
PyPIMMS57      DNKDDNQKVLISYIVKCFRNIYYSAFYLMGNKRTY 786
PcPIMMS57      NNKDENQKVLISYIMKCFRNIYYSAFYIMNNKRN- 772
PkPIMMS57      SNQDEGYRHLIQQILKYVRNVHSTVFE----- 782
PvPIMMS57      SNQDQGYRLLIQHVLKYVQNVHLLTVLE----- 817
Consensus      ..::: . :~* . * ..*~:~: .::

```

### Figure S2. Multiple sequence alignment of *Plasmodium PIMMS57* orthologues

Sequence alignment of PIMMS57 orthologs in six *Plasmodium* species: *P. falciparum* (PfPIMMS57; PF3D7\_1244500), *P. berghei* (PbPIMMS57; PBANKA\_1457700), *P. yoelii* (PyPIMMS57; PYYM\_1461700), *P. chabaudi* (PcPIMMS57; PCHAS\_1460000), *P. knowlesi* (PkPIMMS57; PKNH\_1463700) and *P. vivax* (PvPIMMS57; PVX\_101120). In the consensus sequence, dots and colons mark conserved amino acid residues with weakly and strongly similar properties, respectively, and asterisks mark amino acid residues that are identical between orthologues. Predicted signal peptides are highlighted in grey and predicted transmembrane domains are shown with red fonts, respectively. Predicted *P. falciparum* serine/threonine protein phosphatase type I catalytic (PfPP1c) binding motifs are shown in boxes.

**PfPIMMS22** MTNII ECTFKT PPDNAKTPDNAV IWNQFYQCDEK GWYSLSNHDEIALRPTTFNDKRIKFL 60  
**PbPIMMS22** MTNVVECTFKT P PETAKAPDNAV IWNRFQYQCDEK GWYSLSNHDEITLRPTIFNDGRIKFL 60  
**PyPIMMS22** MTNVVECTFKAP PETAKAPDNAV IWNRFQYQCDEK GWYSLSNHDEITLRPTIFNDGRIKFL 60  
**PcPIMMS22** MTNVVECTFKI P PETAKAPDNAV IWNRFQYQCDEK GWYSLSNHDEITLRPTIFNDDRIKFL 60  
**PkPIMMS22** MTNVVECTFKT P PETAKAPENAV IWNRFQYQCDEK GWYSLTNHDEIMLRPTAFSDGRIKFL 60  
**PvPIMMS22** MTNVVECTFKT P PETAKAPDNA IWNRFQYQCDEK GWYSLTNHDEIMLRPTAFSDGRIKFL 60  
**Consensus** \*\*\*.:\*\*\*\*\* \*.:.\*\*.:\*\*.\* \*\* \*\*\*\*\*:\*.\*\* \*\*\*\*\* \*. \* \*\*\*\*\*

**PfPIMMS22** VQLPEIPSEFES ILSGRYDAKAWGKEDCVVIEG EKDVHIRLPGFKEKINYNHTRFPTF 120  
**PbPIMMS22** PQLDTIPEEFESVLCGKYDAKAWGKDDCNLVIEG EKDVHISLPLGKKEKINYNHKERFPTF 120  
**PyPIMMS22** PQLDTIPEEFESVLCGKYDAKAWGKDDCNVIEG EKDVHISLPLGKKEKINYNHKERFPTF 120  
**PcPIMMS22** PQLDTIPEEFESVLCGKYDAKAWGKDDCNVIEG EKDVHISLPGIKEKINYNHKERFPTF 120  
**PkPIMMS22** PQLDKIPEEFESVLCGKYDAKAWGKDDCNVIEG EKDVHISLPLGQEKINYNHRRERFPTF 120  
**PvPIMMS22** PQLDKIPEEFESVLCGKYDAKAWGKDDCNVIEG EKDVHISLPLGQEKINYNHRRERFPTF 120  
**Consensus** \*\* \*.\*\*.\*.:.\*\*.:\*\*.:\*\*.\* \*\* \*\*\*\*\*:\*.\*\* \*\*\*\*\* \*\*.:\*\*\*\*\* \*\*\*\*\*

**PfPIMMS22** LKNWKIIVSILNEHVTLIRINAETALIININEKKNVTVKSVDFNNGFLCVNPHTNLAIAY 180  
**PbPIMMS22** LKNSKIIVSLLNENLTVIRINLETALLICINEKKSIVKVINFNNGFACVNPYSNLAIAY 180  
**PyPIMMS22** LKNSKIIVSLLNENLTVIRINIETGLLISINEKKSIVKVINFNNGFACVNPYSNLAIAY 180  
**PcPIMMS22** LKNSKIIVSLLNENITVIRINIETALLICINEKKNVIVKVINFNKGFACVNPYSNLAIAY 180  
**PkPIMMS22** LKNWKIIVGMLNEHITVIRIN TETAI IISISEKKNVTVKCVDFNNGFLCVNPHTNLAIAY 180  
**PvPIMMS22** LKNWKIIVGMLNEHITVIRIN TETAI IIVSINEKSNVTVKCVDFNNGFLCVNPHTNLAIAY 180  
**Consensus** \*\*\* \*\*.:\*\*.:\*\*.:\*\*.\* \*\* .:..\* \*\*..\* \*\*.:\*\*.\* \*\*\*\*\*:\*\*\*\*\*.\*

**PfPIMMS22** GDFALSSLKKCELIQNI PHEGGKWGFFTHLFWGHI IIPKELEIKLPSPGLKLI GKKIDT 240  
**PbPIMMS22** GGFAFNDLKKCEIVPTI THSGCEWAFFVHLFWGHI IIPKDLELKI PSSGLKLI GKKVDT 240  
**PyPIMMS22** GGFAFNDLKKCEIVPTI THSGCEWAFFVHLFWGHI IIPKDLELKI PSSGLKLI GKKVDT 240  
**PcPIMMS22** GGFAFNDLKKCEVVP SITHSGCEWAFFVHLFWGHI IIPKDIELKI PSPGLKLI GKRVD 240  
**PkPIMMS22** GGFALSELKKCELVPSI THEGAEWGFFVHLFWGHI IIPKDIEIKLPSPGLKLI GKKIDT 240  
**PvPIMMS22** GDFALSELKKCELVPN I THEGAEWGFFVHLFWGHI IIPKDIEIKLPSPGLKLI GKKIDT 240  
**Consensus** \*.\*\*.:..\*\*\*\*\*:..\* \*\*.\* :\*.\*\*.\*\*\*\*\*\*:\*\*\*\*\*:\*.\*\*.\* \*\*\*\*\*:..\*\*

**PfPIMMS22** LAIVSIPPNIHIVKIDGPKCIRKLEYGQDYNITAIKSSSEDVDIYILFDGHL LKYEFSF 300  
**PbPIMMS22** IAIVSLPPNIQIHVKIDGPKCIRKVEYGQDYNITAIKSSSEDIDIYVLF DQGQLLYEFSY 300  
**PyPIMMS22** IAII SLPPNIQIHVKIDGPKCIRKVEYGQDYNITAIKSSSEDIDIYVLF DQGQLLYEFSY 300  
**PcPIMMS22** IAII SLPPNIQIHVKIDGPKCVRKVEYGQDYNITAIKSSSEDIDIYVLF DQGQLLYEFSY 300  
**PkPIMMS22** VAIISLPPNIYI HVKIDGPKCIRKLEYGQDYSITAIKSSSEDIDIYVLF DQQLIKYEFSF 300  
**PvPIMMS22** VAIISLPPNIYI HVKIDGPKCIRKLEYGQDYSITAIKSSSEDIDIYLLFDGQLIKYEFSF 300  
**Consensus** :\*\*.:\*\*.\* \*\*\*\*\*:\*\*\*\*\*:\*.\*\*.\* \*\* \*\*\*\*\*:\*\*\*:\*\*\*:\*.\*\*.\* \*\*

**PfPIMMS22** DIRLNKPEKGRSLHSAKLKCKIN SKSVTSFIFQETKNCKILLG SNCPSDNLGHLLNSQTI 360  
**PbPIMMS22** DTRLNKEGKGKS IHNAKLKCTSKSKEVSTFIFQESPNCKVLLG SNCPTDNLGHMLCNQTI 360  
**PyPIMMS22** DTRLNKEGKGKS IHNAKLKCKISKSKEVSTFVFQESQNCVLLG SNCPTDNLGHMLCNQTI 360  
**PcPIMMS22** DTRLNKEGKGKS IHNAKLKCKISKSKEVSTFVFQESPNCKVLLG SNCPTDNLGHMLCNQTI 360  
**PkPIMMS22** DTRLNKVKGGRS INCAKLKCTNKSKEVTSFIFQPTANSKLLLD SNCPTDNMGHLLCNQTM 360  
**PvPIMMS22** DTRLNKVKGGRS INYAKLKCTNKSKEVTSFVFQATANSKLLLD SNCPTDNMGHLLCNQTI 360  
**Consensus** \* \*\*\*\*\* \*\*.:\*\*.: \*\*\*\*\* .\*\*\*\*\*:\*.\*\*.\* :\*.\*\*.\* \*\*\*\*\*:\*\*\*.\* \*\*.

```

PfPIMMS22      AIFDAEIGEYLSHPQGLQLTSVFNTLSYPLDKE 393
PbPIMMS22      SIFDAEIGEYQSHPQGLLLTEAFEKLSYPVENA 393
PyPIMMS22      SIFDAEIGEYQSHPQGLLLTEVFEKLSYPVENA 393
PcPIMMS22      SIFDAEIGEYQSHPQGILLTEVFEKLSYPVENA 393
PkPIMMS22      SVFDAETGEYLSHPQGLKLTEVFNSLSYPPEE- 392
PvPIMMS22      SVFDAETGEYLSHPQGLQLTEVFNTLSYPPEKE 393
Consensus      ::*:*:*  ***  *****:  **..*:.*****  ::

```

**Figure S3. Multiple sequence alignment of *Plasmodium PIMMS22* orthologues**

Sequence alignment of PIMMS22 orthologues in six *Plasmodium* species: *P. falciparum* (PfPIMMS22; PF3D7\_0814600), *P. berghei* (PbPIMMS22; PBANKA\_1422900), *P. yoelii* (PyPIMMS22; PY17X\_1424900), *P. chabaudi* (PcPIMMS22; PCHAS\_1424700), *P. knowlesi* (PkPIMMS22; PKNH\_1425600) and *P. vivax* (PvPIMMS22; PVX\_123040). In the consensus sequence, dots and colons mark conserved amino acid residues with weakly and strongly similar properties, respectively, and asterisks mark amino acid residues that are identical between orthologues.

**PfPIMMS22** ---MTNIECTFKTPPDNAKTPDNAVWQFYCYDEKQWYSLSNHDEIALRPTTFNDKRI 57  
**PbPIMMS22** ---MTNVVECTFKTPPETAKAPDNAVWNRFYCYDEKQWYSLSNHDEITLRPTIFNDGRI 57  
**PyPIMMS22** ---MTNVVECTFKAPPETAKAPDNAVWNRFYCYDEKQWYSLSNHDEITLRPTIFNDGRI 57  
**PcPIMMS22** ---MTNVVECTFKIPPETAKAPDNAVWNRFYCYDEKQWYSLSNHDEITLRPTIFNDGRI 57  
**PkPIMMS22** ---MTNVVECTFKTPPETAKAPENAVWNAFYCYDEKQWYSLTNHDEIMLRPTAFSDGRI 57  
**PvPIMMS22** ---MTNVVECTFKTPPETAKAPDNAIWNSFYCYDEKQWYSLTNHDEIMLRPTAFSDGRI 57  
**T.gondii S15** ---MERQATCRYDPLVEVP-LPPGIVLWTPHQYYDGAGWLALPDREKLELKPTRWSDGRL 56  
**N.caninum S15** ---MERLSTCRYDPLTEVP-LPPGIVLWTPHQYYDGAGWLALPEHEKLMKPTRWADGRL 56  
**E.tenella S15** MEAVNKLCSCRFEPLVEVP-VPEKAVVWTSKNYDGSQWVGLADGEKLSLKPTLFDNRRL 59  
**Consensus** : . \* : . : . \* : : \* . : \* \* \*\* . \* : : : : \* \* : \* \* :

**PfPIMMS22** KFLVQLPEIPSEFESILSGRYDAKAWGKEDCYVVEIEGKDVHIRLPGFKEKINYNHTRERF 117  
**PbPIMMS22** KFLPQLDTIPEEFESVLCGKYDAKAWGKDDCNLVIEGKDVHISLPLGKEKINYNHKERF 117  
**PyPIMMS22** KFLPQLDTIPEEFESVLCGKYDAKAWGKDDCNVVEIEGKDVHISLPLGKEKINYNHKERF 117  
**PcPIMMS22** KFLPQLDTIPEEFESVLCGKYDAKAWGKDDCNVVEIEGKDVHISLPLGKEKINYNHKERF 117  
**PkPIMMS22** KFLPQLEKIPEEFESVLCGKYDAKAWGKDDCNVIEGKDVHISLPLQEKINYNHRERF 117  
**PvPIMMS22** KFLPQLEKIPEEFESVLCGKYDAKAWGKDDCNVIEGKDVHISLPLQEKINYNHRERF 117  
**T.gondii S15** RFLDPIDELPEPFKAVQSGKFDVKCWRGDCKLGIKDTVFLKSPISPDVAVYVHAERL 116  
**N.caninum S15** RFLDPIDELPEPFKAVQSGKFDVKCWRGDCKLGIKDTVFLKAPISPEVAVYVHADRL 116  
**E.tenella S15** LFLEPVEGVCEAFSSVQSGKYDVKCWSKLGCHLGIKDTVFLSTPKLKEVAVYSHPERL 119  
**Consensus** \* \* : : . \* : : \* : : \* : : \* : : \* : : \* : : \* : : \* : : \* : : \* : :

**PfPIMMS22** PTFLKNWKIIVSILNEHVTLIRINAETALIININEKKNVTVKSVDENNGFLCVNPHTNLA 177  
**PbPIMMS22** PTFLKNSKIIVSLLNENLTVIRINLETALLICINEKKSIVIVKSNFNNGFACVNPYSNLA 177  
**PyPIMMS22** PTFLKNSKIIVSLLNENLTVIRINLETALLICINEKKSIVIVKSNFNNGFACVNPYSNLA 177  
**PcPIMMS22** PTFLKNSKIIVSLLNENITVIRINLETALLICINEKKNVIVKSNFNNGFACVNPYSNLA 177  
**PkPIMMS22** PTFLKNWKIIVGMLNEHITVIRINTETAIISISEKKNVTVKSVDENNGFLCVNPHTNLA 177  
**PvPIMMS22** PTFLKNWKIIVGMLNEHITVIRINTETAIIVSINEKSNVTVKSVDENNGFLCVNPHTNLA 177  
**T.gondii S15** PTFPKSWKPLVFIILNQSLAMFRLTENLCLLVVAEKDKTMNISCVDYNGGFACHPSTNMV 176  
**N.caninum S15** PAFPKTWKPLVFIILNQSVAMFRLTENLCLLVVENDKTMNISCVDYNGGFACHPKTNMV 176  
**E.tenella S15** PAFPKSWKPLVFIILNQSVAMFRLTENLCLLVVENDKTMNISCVDYNGGFALSHPASDSA 179  
**Consensus** \* : \* \* . \* : : \* \* . : : \* : : \* : : \* : : \* : : \* : : \* : : \* : :

**PfPIMMS22** IAYGDFALS---SLKKCELIQNIPEHGGKWFTHLFWKGHIIIPKELEIKLPS--PGLK 232  
**PbPIMMS22** IYGGFAFN---DLKKCEIVPTITHSGCEWAFFVHLFKWGHIVIPKDLELKIPS--SGLK 232  
**PyPIMMS22** IAYGGFAFN---DLKKCEIVPTITHSGCEWAFFVHLFKWGHIIIPKDLELKIPS--SGLK 232  
**PcPIMMS22** IAYGGFAFN---DLKKCEVVPSTHSGCEWAFFVHLFKWGHIIIPKDIEIKLIPS--PGLK 232  
**PkPIMMS22** IAYGGFALS---ELKKCELVPSITHEGAEWGFFVHLFKWGHIIIPKDIEIKLIPS--PGLK 232  
**PvPIMMS22** IAYGDFALS---ELKKCELVPSITHEGAEWGFFVHLFKWGHIIIPKDIEIKLIPS--PGLK 232  
**T.gondii S15** VAYGSYVLKNFEKLPSCQAIKMLTASGDWGFVQFYFPWGFVFPKSVELTRPQAVLGAV 236  
**N.caninum S15** VAYGSYIVKTFEKLNSCAAIPKMTASGDWGFVQFYFPWGFVFPKSVLELTRPQAVLGAV 236  
**E.tenella S15** LAYGSLAVKGFALPHCEVIVPRTSAAGEWGFVQLFQWGSFVVPKAVDLTRPSSILG-M 238  
**Consensus** : : \* \* . \* : : \* : : \* : : \* : : \* : : \* : : \* : : \* : : \* : :

**PfPIMMS22** LIGKKIDTVAIIVSIPPNIIHVKIDGP-KCIRKLEYGQDYNITAIKSSSDVDIYVLFDFG 291  
**PbPIMMS22** LIGKKVDTIAIVSLPPNIQIHKIDGP-KCIRKVEYGQDYNITAIKSSSDIDIYVLFDFG 291  
**PyPIMMS22** LIGKKVDTIAIISLPPNIQIHKIDGP-KCIRKVEYGQDYNITAIKSSSDIDIYVLFDFG 291  
**PcPIMMS22** LIGKRVDTIAIISLPPNIQIHKIDGP-KCVRKVEYGQDYNITAIKSSSDIDIYVLFDFG 291  
**PkPIMMS22** LIGKKIDTVAIISLPPNIYIHKIDGP-KCIRKLEYGQDYSITAIKSSSDIDIYVLFDFG 291  
**PvPIMMS22** LIGKKIDTVAIISLPPNIYIHKIDGP-KCIRKLEYGQDYSITAIKSSSDIDIYVLFDFG 291  
**T.gondii S15** GMGKKVDTIGLVFHPNMFINVKLDIPAKTTRALQFGKDFQVTAKKTSETDIDVFLVIDG 296  
**N.caninum S15** GMGKKVDTIGLVFHPNMFINVKLDLPAKTTRALQFGKDFQVTAKKTSETDIEIFLVIDG 296  
**E.tenella S15** GLGKKVDCLGVLLLPNLLVVMVHLETP-KVQRSLQHGKDYLLTAVKTSSETDLDFLVMVDG 297  
**Consensus** : \* : : \* : : \* : : \* : : \* : : \* : : \* : : \* : : \* : : \* : :

**PfPIMMS22** HLLKYEFSDIRLNKPEKGRSLHSAKLCIN----KSKEVTSFIFQETKNCKILLGNSNCP 347  
**PbPIMMS22** QLLKYEFSDYDTRLNKEGKGSINHAKLKCTS----KSKEVSTFIFQESPNCKVLLGNSNCP 347  
**PyPIMMS22** QLLKYEFSDYDTRLNKEGKGSIHAKLKCSIS----KSKEVSTFVFQESQNCVLLGNSNCP 347  
**PcPIMMS22** QLLKYEFSDYDTRLNKEGKGSINHAKLKCSIS----KSKEVSTFVFQESPNCKVLLGNSNCP 347  
**PkPIMMS22** QLIKYEFSFDTRLNKVGKGRSINCAKLCNTN----KSKEVTSFIFQPTANSKLLLDNSNCP 347  
**PvPIMMS22** QLIKYEFSFDTRLNKVGKGRSINYAKLCNTN----KSKEVTSFVFQATANSKLLLDNSNCP 347  
**T.gondii S15** QLAKYNYSFDIRINKPERPKHTDNIHFKCSCDAEKKKPKPKFKLSACKDSVILLEQGCP 356  
**N.caninum S15** QLAKYNYSFDIRNNKPERPKHTDNIHFKCTDAEKKKPEPRFKLTACKDSVILLEQGCP 356  
**E.tenella S15** QLSVFNYSFDLRLNRPKNRHLDNAAFKGSLELDDKKK-CSRFIQNTKNSKVLVFPQGCP 356  
**Consensus** : \* : : \* : : \* : : \* : : \* : : \* : : \* : : \* : : \* : : \* : :

```

PfPIMMS22      SDNLG-HLLNSQTIAIFDAEIGEYLSHPQGLQLTSVFNTLSYPLDKE 393
PbPIMMS22      TDNLG-HMLCNQTISIFDAEIGEYQSHPOGLLLTEAFEKLSYPVENA 393
PyPIMMS22      TDNLG-HMLCNQTISIFDAEIGEYQSHPOGLLLTEVFEEKLSYPVENA 393
PcPIMMS22      TDNLG-HMLCNQTISIFDAEIGEYQSHPOGILLTEVFEEKLSYPVENA 393
PkPIMMS22      TDNMG-HLLCNQTMVFDVAETGEYLSHPQGLKLTVEFNLSYPPEE- 392
PvPIMMS22      TDNMG-HLLCNQTSVFDVAETGEYLSHPQGLQLTEVFNTLSYPPEKE 393
T.gondii S15    SGNPDEQLVSEQLIACFDAEVCLYTHPPALKLCDAFTDVAIRE--- 400
N.caninum S15  CGNPDEQLVSEQVIAFFDAEVCLYTHPPALKLCDAFTDVAIRE--- 400
E.tenella S15  LSEGD-HLVSSSLIAVFDAEICMYLTHPPALKLCSAFNTVALPVD-- 400
Consensus      .: . ::: .. :: ***** * :** .: * ..* ::

```

**Figure S4. Multiple sequence alignment of *Plasmodium* PIMMS22 and homologues in other apicomplexans**

Sequence alignment of PIMMS22 orthologues in six *Plasmodium* species and homologs in other apicomplexan parasites. UniProt ID's- *T. gondii* S15 (CEL77905.1), *N. caninum* S15 (XP\_003885565.1) and *E. tenella* S15 (XP\_013230639.1). In the consensus sequence, dots and colons mark conserved amino acid residues with weakly and strongly similar properties, respectively, and asterisks mark amino acid residues that are identical between orthologues.



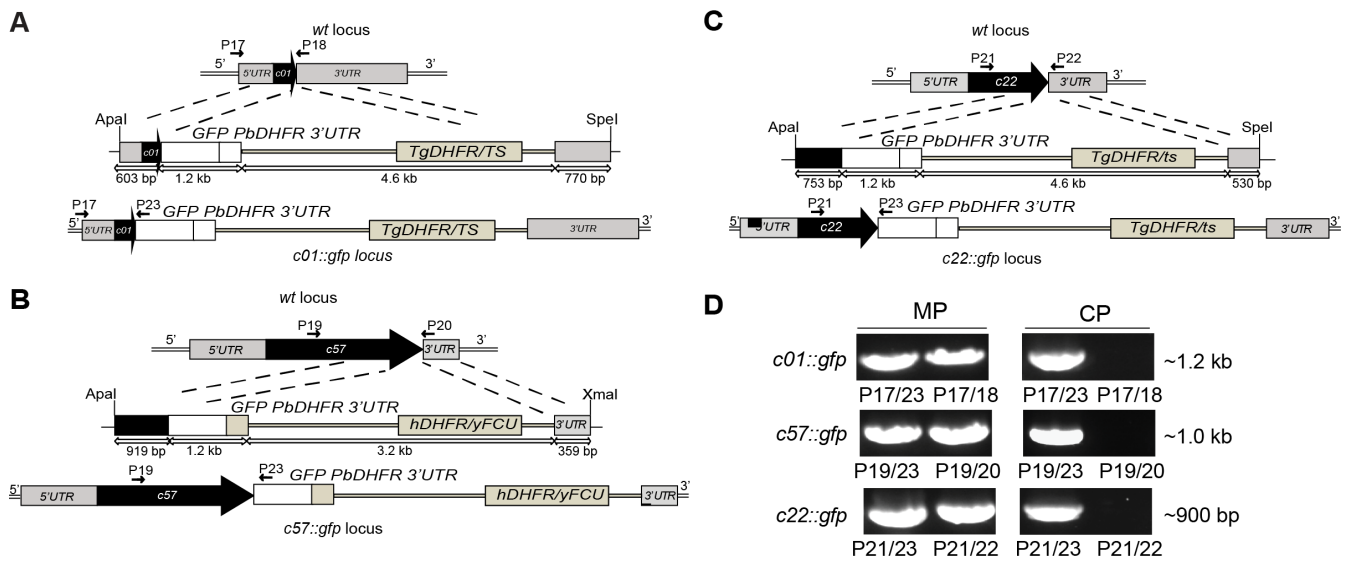

**Figure S5. Generation of GFP-tagged *P. berghei* transgenic lines in the ANKA 2.34 reference line**

Schematic representation of the *PIMMS01* (*c01::gfp*) (**A**), *PIMMS57* (*c57::gfp*) (**B**) and *PIMMS22* (*c22::gfp*) (**C**) GFP tagging by double crossover homologous recombination. Black arrows indicate binding sites for primers used in diagnostic PCR. (**D**) PCR genotypic analysis on mix parasite (MP) and clonal populations (CP) of the tagged transgenic parasites following transfection and dilution cloning. Used primer combinations are shown below each detected band.

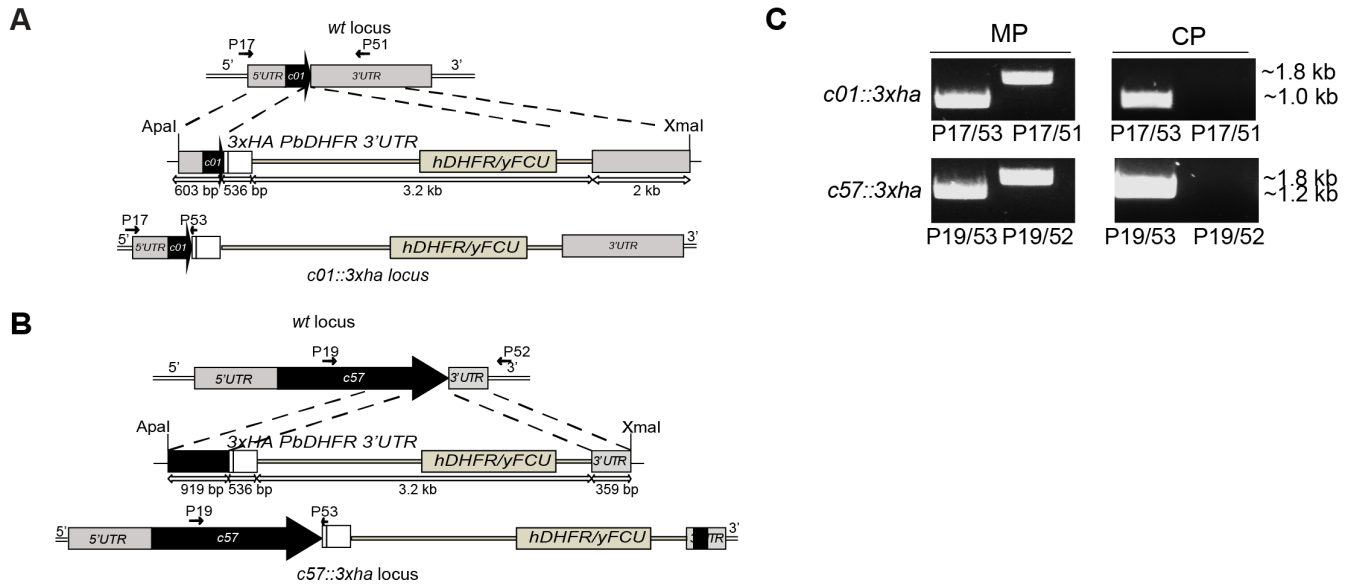

**Figure S6. Generation of HA-tagged *P. berghei* transgenic lines in the ANKA 2.34 reference line**

Schematic representation of the *PIMMS01* (*c01::3xha*) (**A**) and *PIMMS57* (*c57::3xha*) (**B**) HA tagging by double crossover homologous recombination. Black arrows indicate binding sites for primers used in diagnostic PCR. (**C**) PCR genotypic analysis on mix parasite (MP) and clonal populations (CP) of the tagged transgenic parasites following transfection and dilution cloning. Used primer combinations are shown below each detected band.

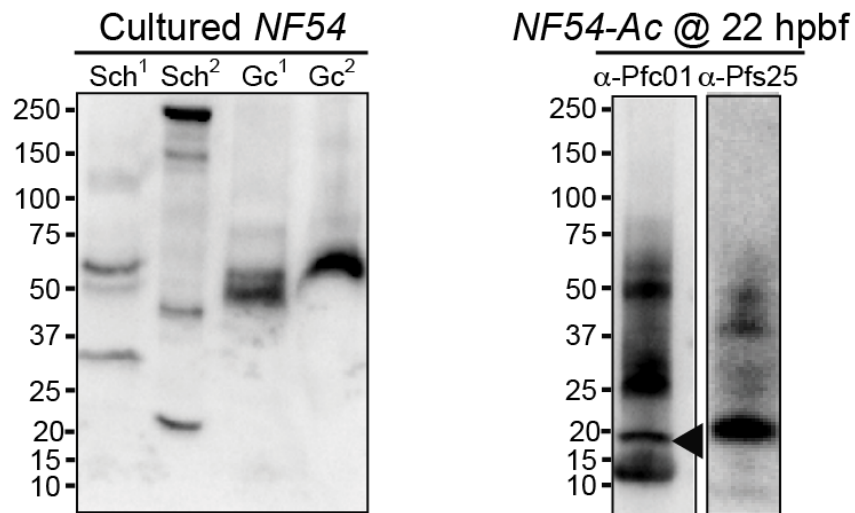

**Figure S7. PfPIMMS01 expression in *in vitro* cultured schizonts and gametocytes**

Western blot analysis using  $\alpha$ -Pfc01 antibody on Triton soluble lysates (<sup>1</sup>), Triton insoluble cell lysates (<sup>2</sup>) and whole cell lysates (<sup>3</sup>) of *P. falciparum* NF54 schizonts (Sch), gametocytes (Gc) and *A. coluzzii* midgut homogenates 22 hpbf. The PfPIMMS01 protein band is indicated with a black arrowhead. The antibody against Pfs25 ( $\alpha$ -Pfs25) was used as a positive control in midgut homogenates.

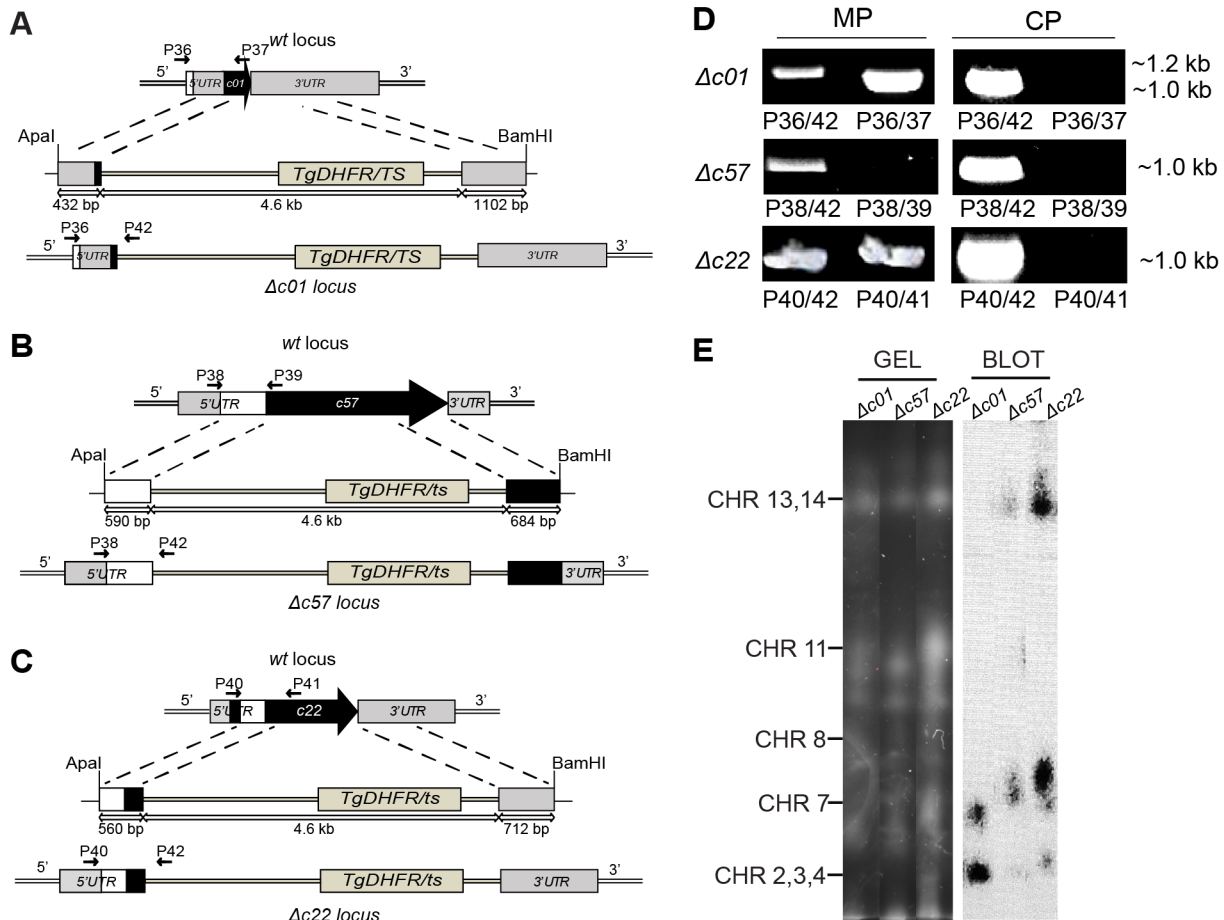

**Figure S8. Generation of *P. berghei*  $\Delta c01$ ,  $\Delta c57$  and  $\Delta c22$  knockout mutant lines**

Schematic representation of *P. berghei* *PIMMS01* (A), *PIMMS57* (B) and *PIMMS22* (C) locus disruption by double crossover homologous recombination in the *c507* transgenic reference line. Black arrows indicate binding sites for primers used in diagnostic PCR. (D) PCR genotypic analysis on mix parasite (MP) and clonal populations (CP) of the knockout mutant parasites following transfection and dilution cloning. Used primer combinations are shown below each detected band. (E) Southern blot analysis on pulsed field gel electrophoresis separated transgenic chromosomes.

## **Legends of Supplementary Movies**

### **Supplementary Movie 1. Gliding motility of c507 ookinetes.**

In vitro cultured ookinetes were embedded in Matrigel and their movement was captured with time-lapse microscopy at 20 frames per sec for 2 min.

### **Supplementary Movie 2. Gliding motility of $\Delta c01$ ookinetes.**

In vitro cultured ookinetes were embedded in Matrigel and their movement was captured with time-lapse microscopy at 20 frames per sec for 2 min.

### **Supplementary Movie 3. Gliding motility of $\Delta c01$ ookinetes.**

In vitro cultured ookinetes were embedded in Matrigel and their movement was captured with time-lapse microscopy at 20 frames per sec for 2 min.

### **Supplementary Movie 4. Gliding motility of $\Delta c57$ ookinetes.**

In vitro cultured ookinetes were embedded in Matrigel and their movement was captured with time-lapse microscopy at 20 frames per sec for 2 min.

### **Supplementary Movie 5. Gliding motility of $\Delta c57$ ookinetes.**

In vitro cultured ookinetes were embedded in Matrigel and their movement was captured with time-lapse microscopy at 20 frames per sec for 2 min.

### **Supplementary Movie 6. Gliding motility of $\Delta c57$ ookinetes.**

In vitro cultured ookinetes were embedded in Matrigel and their movement was captured with time-lapse microscopy at 20 frames per sec for 2 min.

### **Supplementary Movie 7. Gliding motility of $\Delta c22$ ookinetes.**

In vitro cultured ookinetes were embedded in Matrigel and their movement was captured with time-lapse microscopy at 20 frames per sec for 2 min.

### **Supplementary Movie 8. Gliding motility of $\Delta c22$ ookinetes.**

In vitro cultured ookinetes were embedded in Matrigel and their movement was captured with time-lapse microscopy at 20 frames per sec for 2 min.
