# Supplementary material for: Identification of Three Novel Plasmodium Factors Involved in Ookinete to Oocyst Developmental Transition
Source: PubMed Central journal article supplement (PMC8005625; doi:10.3389/fcimb.2021.634273), 2021-03-15
Supplement: Table_1.pdf [file Table_1.pdf]

**Table S1. Sporozoite numbers of *P. berghei* GFP tagged parasites in *A. coluzzii* infections.**

| Parasite        | Mean  | SEM  | P-value |
|-----------------|-------|------|---------|
| ANKA 2.34       | 5,934 | 2875 |         |
| <i>c01::gfp</i> | 612   | 395  | 0.0048  |
| <i>c57::gfp</i> | 354   | 175  | 0.0042  |
| <i>c22::gfp</i> | 8,441 | 2422 | 0.4880  |

Mean oocyst sporozoite numbers from two biological replicates of *A. coluzzii* infections with transgenic *P. berghei* parasites carrying GFP tagged versions of the genes *PIMMS01*, *PIMMS57* and *PIMMS22*. For each biological replicate sporozoite numbers were determined from at least 30 homogenized mosquito midguts 15 dpbf. P values were calculated using the unpaired Student's t-test. SEM represents standard error of mean.

**Table S2. Oocyst numbers of *P. berghei* HA-tagged parasites in *A. coluzzii* infections**

| Time   | Parasite         | Number of midguts | Prevalence (%) | Arithmetic mean | Median | Parasite Range | P value | Fold difference |
|--------|------------------|-------------------|----------------|-----------------|--------|----------------|---------|-----------------|
| 8 dpbf | <i>c507</i>      | 20                | 75             | 47.9            | 39     | 0-164          |         |                 |
|        | <i>c01::3xha</i> | 29                | 59             | 12.6            | 3      | 0-61           | 0.0076  | 3.8             |
|        | <i>c57::3xha</i> | 35                | 49             | 3.5             | 0      | 0-22           | 0.0001  | 13.7            |

This table summarizes the oocyst data from two replicates of *A. coluzzii* infected with transgenic *P. berghei* parasites carrying 3xHA tagged versions of the genes *PIMMS01* and *PIMMS57*. P values were calculated using the Mann-Whitney t-test. Fold differences between the transgenic parasites and the *507 wt* oocyst densities were calculated using the arithmetic mean.

**Table S3. Oocyst numbers of *c507*,  $\Delta c01$ ,  $\Delta c57$  and  $\Delta c22$  parasites in *A. coluzzii* infections**

| Time         | Parasite     | Number of exp | Number of midguts | Prevalence (%) | Arithmetic mean | Median  | Parasite Range | P value | Fold difference |
|--------------|--------------|---------------|-------------------|----------------|-----------------|---------|----------------|---------|-----------------|
| 8 dpbf       | <i>c507</i>  | Pool          | 120               | 77             | 27.6            | 8       | 0-203          |         |                 |
|              | $\Delta c01$ |               | 73                | 52             | 4.3             | 1       | 0-40           | <0.0001 | 6.4             |
|              | $\Delta c57$ |               | 89                | 40             | 1.2             | 0       | 0-14           | <0.0001 | 23.0            |
|              | $\Delta c22$ |               | 81                | 56             | 4.5             | 1       | 0-33           | <0.0001 | 6.1             |
|              | <i>c507</i>  | R1            | 40                | 85             | 29.7            | 6       | 0-203          |         |                 |
|              | $\Delta c01$ |               | 17                | 65             | 5.9             | 1       | 0-40           | 0.0222  | 5.0             |
|              | $\Delta c57$ |               | 39                | 33             | 0.7             | 0       | 0-6            | <0.0001 | 42.4            |
|              | $\Delta c22$ | 20            | 55                | 4.6            | 1               | 0-28    | 0.0045         | 6.5     |                 |
|              | <i>c507</i>  | R2            | 42                | 52             | 20.2            | 1       | 0-166          |         |                 |
|              | $\Delta c01$ |               | 26                | 19             | 1.9             | 0       | 0-20           | 0.0041  | 10.6            |
|              | $\Delta c57$ |               | 19                | 42             | 1.1             | 0       | 0-7            | 0.0939  | 18.4            |
|              | $\Delta c22$ | 30            | 30                | 1.2            | 0               | 0-12    | 0.0111         | 16.8    |                 |
|              | <i>c507</i>  | R3            | 38                | 95             | 33.4            | 24      | 0-137          |         |                 |
|              | $\Delta c01$ |               | 30                | 73             | 5.5             | 3       | 0-29           | <0.0001 | 6.1             |
|              | $\Delta c57$ |               | 31                | 48             | 1.9             | 0       | 0-14           | <0.0001 | 17.6            |
| $\Delta c22$ | 31           | 81            | 7.6               | 6              | 0-33            | <0.0001 | 4.4            |         |                 |

This table summarizes the oocyst data from three biological replicates of *A. coluzzii* infected with *c507*,  $\Delta c01$ ,  $\Delta c57$  or  $\Delta c22$  parasite lines. P values were calculated using the Mann-Whitney t-test. Fold differences between the mutant parasites and the *507 wt* oocyst densities were calculated using the arithmetic mean.

**Table S4. Sporozoite numbers of *c507*,  $\Delta c01$ ,  $\Delta c57$  and  $\Delta c22$  parasites in *A. coluzzii* infections**

| Parasite     | Replicates | Midgut Sporozoites |     |         | Salivary gland Sporozoites |       |         | Bite-back         |
|--------------|------------|--------------------|-----|---------|----------------------------|-------|---------|-------------------|
|              |            | Mean               | SEM | P-value | Mean                       | SEM   | P-value |                   |
| <i>c507</i>  | 3          | 3,556              | 970 |         | 4,344                      | 1,086 |         | 6/6 (2/2;2/2;2/2) |
| $\Delta c01$ | 3          | 256                | 48  | 0.0488  | 110                        | 68    | 0.0337  | 0/6 (0/2;0/2;0/2) |
| $\Delta c57$ | 3          | 197                | 113 | 0.0484  | 36                         | 7     | 0.0317  | 0/6 (0/2;0/2;0/2) |
| $\Delta c22$ | 3          | 223                | 24  | 0.0486  | 211                        | 144   | 0.0369  | 0/6 (0/2;0/2;0/2) |

Mean oocyst and salivary gland derived sporozoite numbers from three biological replicates of *A. coluzzii* infections. For each biological replicate (shown in brackets), sporozoite numbers was determined from 25-30 homogenized mosquito midguts or salivary glands at days 15 and 21 dpbf respectively. Infectivity of sporozoites was assessed by infected mosquito bite back experiments with at least 30 mosquitoes on C57/BL6 mice at 21 dpi. Following this, parasitaemia was monitored until 14 days post mosquito bite. P values were calculated using the unpaired Student's t-test. SEM represents standard error of mean.

**Table S5. Invasion assay in CTL4 knockdown *A. coluzzii***

| Time   | Parasite     | Number of exp | Number of midguts | Prevalence (%) | Arithmetic mean | Median | Parasite range | P value |
|--------|--------------|---------------|-------------------|----------------|-----------------|--------|----------------|---------|
| 7 dpbf | <i>c507</i>  | Pool          | 65                | 78             | 56.9            | 18     | 0-558          |         |
|        | $\Delta c01$ |               | 66                | 70             | 45.2            | 10.5   | 0-419          | 0.3971  |
|        | $\Delta c57$ |               | 70                | 69             | 30.5            | 6      | 0-356          | 0.0337* |
|        | $\Delta c22$ | R1            | 79                | 71             | 30.5            | 7      | 0-581          | 0.0487* |
|        | <i>c507</i>  |               | 35                | 83             | 49.7            | 13     | 0-558          |         |
|        | $\Delta c01$ |               | 30                | 63             | 41.5            | 12.5   | 0-231          | 0.4145  |
|        | $\Delta c57$ | R2            | 33                | 70             | 47.6            | 8      | 0-356          | 0.5952  |
|        | $\Delta c22$ |               | 48                | 75             | 38.9            | 7      | 0-581          | 0.2605  |
|        | <i>c507</i>  |               | 30                | 73             | 65.2            | 18.5   | 0-533          |         |
|        | $\Delta c01$ |               | 36                | 75             | 48.3            | 10.5   | 0-419          | 0.6583  |
|        | $\Delta c57$ |               | 37                | 68             | 15.2            | 4      | 0-113          | 0.0299* |
|        | $\Delta c22$ |               | 31                | 65             | 17.6            | 7      | 0-148          | 0.0708  |

Numbers of melanised parasites detected in the midguts of *c507* or  $\Delta c01$  or  $\Delta c57$  or  $\Delta c22$  infected CTL4 kd *A. coluzzii* mosquitoes at 7days post feeding. The P value was calculated using the Mann-Whitney U test. Data from pooled and independent biological replicates are presented.

**Table S6. Primers for qRT-PCR and generation of transgenic parasites**

| Primer name                                 | Sequence (5' to 3')                  | Description                         |
|---------------------------------------------|--------------------------------------|-------------------------------------|
| <i>Pbc01</i> qRT-PCR F                      | TCGCTTTATTGTTTACCATAGCATCC           |                                     |
| <i>Pbc01</i> qRT-PCR R                      | TGTATGTTGCTGCTGGATTTTGT              |                                     |
| <i>Pbc57</i> qRT-PCR F                      | GCAGGCTGTTTCGTATGTTGTATT             |                                     |
| <i>Pbc57</i> qRT-PCR R                      | TGTCTTTAAAAGCTTGTGCCATT              |                                     |
| <i>Pbc22</i> qRT-PCR F                      | TTCAGGATGTGAATGGGCATTTTT             |                                     |
| <i>Pbc22</i> qRT-PCR R                      | TAAGAGACCCTGTGGATGACTTTG             |                                     |
| <i>Pfc01</i> qRT-PCR F                      | AACCGTTTCGTTGTATTATGTCCCA            |                                     |
| <i>Pfc01</i> qRT-PCR R                      | GCCTTGGCTGCATTTTCTGTT                |                                     |
| <i>Pfc57</i> qRT-PCR F                      | AGAAAAGTAAATTTTCGCACCACG             |                                     |
| <i>Pfc57</i> qRT-PCR R                      | GTAAC TGGGACCAGCATCCA                |                                     |
| <i>Pfc22</i> qRT-PCR F                      | TGTTAGGTTCCAATTGTCCCAGT              |                                     |
| <i>Pfc22</i> qRT-PCR R                      | AAGACCTTGTGGGTGACTTAGG               |                                     |
| <i>GFP</i> qRT-PCR F                        | CCTGTCTTTTACCAGACAACCA               |                                     |
| <i>GFP</i> qRT-PCR R                        | GGTCTCTTTTTCGTTGGGATCT               |                                     |
| <i>Pf arginyl-tRNA synthetase</i> qRT-PCR F | AAGAGATGCATGTTGGTCATTT               |                                     |
| <i>Pf arginyl-tRNA synthetase</i> qRT-PCR R | GAGTACCCCAATCACCTACA                 |                                     |
| 01 P1 F                                     | TTGGGCCCGCGTTTTGTCCAATACAATAGTATGAT  | GFP Tagging upstream target Apal    |
| 01 P2 R                                     | CCAAGCTTTAACCGTCTATTATTATTTTT        | GFP Tagging upstream target HindIII |
| 01 P3 F                                     | TGAATTCGCACTTGCAATGAAAAAAGGAAACATAG  | GFP Tagging downstream target EcoRI |
| 01 P4 R                                     | TTGGATCCTACTTTTTATTATTCTTATCAAT      | GFP Tagging downstream target BamHI |
| 57 P5 F                                     | TTGGGCCCGAGTTATTAATAGTTCTAAACAATG    | GFP Tagging upstream target Apal    |
| 57 P6 R                                     | GGCCGCGGATAGGTTCTTTTATTGCTCATCA      | GFP Tagging upstream target SacII   |
| 57 P7 F                                     | TTCTCGAGATAATCCATGTATTACATAATGATAAT  | GFP Tagging downstream target XhoI  |
| 57 P8 R                                     | TTCCCGGGAATAAAATTTAATTTCTCTCTAAGAG   | GFP Tagging downstream target XmaI  |
| 22 P9 F                                     | TTGGGCCCGAAACAGCATTATTAATATGCATAAATG | GFP Tagging upstream target Apal    |
| 22 P10 R                                    | CCAAGCTTAGCATTCTTCTACTGGATAAGACAGC   | GFP Tagging upstream target HindIII |
| 22 P11 F                                    | TGAATTCGCCTTTTTATATATAAACGTTGGCG     | GFP Tagging downstream target EcoRI |
| 22 P12 R                                    | TTGGATCCGGATCTTAAATTTGGGGTACTATTTTC  | GFP Tagging downstream target BamHI |
| <i>GFP-DHFR 3'UTR</i> (P13 F)               | TTAAGCTTATGAGTAAAGGAGAAGAACTTTT      | GFP tag HindIII                     |
| <i>GFP-DHFR 3'UTR</i> (P14 R)               | TTAAGCTTCCGAAATTGAAGGAAAAAACATCATTTG | GFP tag HindIII                     |
| <i>GFP-DHFR 3'UTR</i> (P15 F)               | GGCCGCGGATGAGTAAAGGAGAAGAACTTTT      | GFP tag SacII                       |
| <i>GFP-DHFR 3'UTR</i> (P16 R)               | GGCCGCGGCCGAAATTGAAGGAAAAAACATCATTTG | GFP tag SacII                       |
| 01 tag INT F (P17)                          | CATGAATGCTTTAAACTTTCTACATTTTAC       | Diagnostic primer WT and GFP/HA tag |
| 01 GFP tag WT R (P18)                       | CTAATAAACATTTCCCTAATTTTTAACTTA       | Diagnostic primer WT                |
| 57 tag INT F (P19)                          | GAGCAATAGCAATGATAAAAATAATATCG        | Diagnostic primer WT and GFP/HA tag |
| 57 GFP tag WT R (P20)                       | GCATACATATGCATATTCATATTTCCG          | Diagnostic primer WT                |
| 22 tag INT F (P21)                          | GTAAGTTTGTAAATGAGAACCTTACAG          | Diagnostic primer WT and GFP tag    |
| 22 tag WT R (P22)                           | GTTTATATATAAAAAGGCAAAGTAGCG          | Diagnostic primer WT                |
| GFP INT R (P23)                             | CTAATTCACAAGAATTGGGACAACCTCC         | Diagnostic primer GFP tag           |
| 01 P24 F                                    | TTGGGCCCCCAATACAATAGTATGATAC         | Disruption upstream target Apal     |
| 01 P25 R                                    | CCAAGCTTCTCATTATTATAACTGGATGC        | Disruption upstream target HindIII  |
| 01 P26 F                                    | TGAATTCGAATTTGAGAATCGATTATGGAG       | Disruption downstream target EcoRI  |

|                             |                                                                                                                                                                 |                                    |
|-----------------------------|-----------------------------------------------------------------------------------------------------------------------------------------------------------------|------------------------------------|
| 01 P27 R                    | TTGGATCCGATCACGCCTTTATTGAATTAATGAAG                                                                                                                             | Disruption downstream target BamHI |
| 57 P28 F                    | TTGGGCCCTAATATATTATACATAGACAATTGCTC                                                                                                                             | Disruption upstream target Apal    |
| 57 P29 R                    | <u>CCAAGCTT</u> CATATATTGATATATGATTTTAC                                                                                                                         | Disruption upstream target HindIII |
| 57 P30 F                    | <u>TGAATTCGGT</u> ACCATATAACTATTCTGAAGCATATG                                                                                                                    | Disruption downstream target EcoRI |
| 57 P31 R                    | TTGGATCCGCTCATCATATAGAAAGTGGTATAATATATG                                                                                                                         | Disruption downstream target BamHI |
| 22 P32 F                    | TTGGGCCCGATAATATATACATCCATTTTTTTTG                                                                                                                              | Disruption upstream target Apal    |
| 22 P33 R                    | <u>CCAAGCTT</u> CATATTTTCCACATAATACAGATTC                                                                                                                       | Disruption upstream target HindIII |
| 22 P34 R                    | <u>TGAATTCCTT</u> CATGTTTGTATTTTTAAAAAGC                                                                                                                        | Disruption downstream target EcoRI |
| 22 P35 R                    | TTGGATCCGGCATGTATTTAATAAAAATAGCATG                                                                                                                              | Disruption downstream target BamHI |
| 01 INT F (P36)              | GGATGTATTCCTATAACTATGTG                                                                                                                                         | Diagnostic primer WT and KO/c507   |
| 01 WT R (P37)               | CTCCTTGTATGTTGCTGCTGG                                                                                                                                           | Diagnostic primer WT/c507          |
| 57 INT F (P38)              | GATGTCTAGCTAATTTGGGAATTAGTG                                                                                                                                     | Diagnostic primer WT and KO/c507   |
| 57 WT R (P39)               | GCATTATCTCTATCTTCATAATTTG                                                                                                                                       | Diagnostic primer WT/c507          |
| 22 INT F (P40)              | GAAATGGAGCATATATGTAATAAACCCG                                                                                                                                    | Diagnostic primer WT and KO/c507   |
| 22 WT R (P41)               | AAATTTGAATAAGGATTGACGCATGC                                                                                                                                      | Diagnostic primer WT/c507          |
| <i>TgDHFR</i> 5'UTR R (P42) | GATGTGTTATGTGATTAATTCATACAC                                                                                                                                     | Diagnostic primer KO/c507          |
| 01 P43 F                    | GATTACGCCAAGCTT <u>GGGCCCGCG</u> TTTTGTCCAATACAATAGTATGATACTTAATTGTA<br>AGCTAGCT                                                                                | HA Tagging upstream target Apal    |
| 01 P44 R                    | CTAGAGCGGCCGCCACCGCGGCTAAGCATAGTCTGGAACGTCATAAGGGTATGCGTA<br>ATCTGGCACGTCGTATGGATATGCATAATCTGGTACATCGTATGGGTATAACCGTCTAT<br>TATTATTTTTCCATGAATAA                | HA Tagging upstream target SacII   |
| 01 P45 F                    | CTTCAATTTGGGTACCCTCGAGAATACCTCTAAGTAAAAAATTAGGAAATGTTTATTA<br>G                                                                                                 | HA Tagging downstream target XhoI  |
| 01 P46 R                    | GAATTCGCGGCCGCCCGCCGGGTTTTATAAGGTATAATGGAATATGTATGCTC                                                                                                           | HA Tagging downstream target XmaI  |
| 57 P47 F                    | GATTACGCCAAGCTT <u>GGGCCCGAG</u> CAATAGCAATGATAAAAATAATATCGGTAACAGAA<br>GAG                                                                                     | HA Tagging upstream target Apal    |
| 57 P48 R                    | CTAGAGCGGCCGCCACCGCGGCTAAGCATAGTCTGGAACGTCATAAGGGTATGCGTA<br><u>ATCTGGCACGTCGTATGGATATGCATAATCTGGTACATCGTATGGGTAATAGGTTCTTT</u><br><u>TATTGCTCATCATATAGAAAG</u> | HA Tagging upstream target SacII   |
| 57 P49 F                    | CTTCAATTTGGGTACCCTCGAGATAATCCATGTATTACATAATGATAAT                                                                                                               | HA Tagging downstream target XhoI  |
| 57 P50 R                    | GAATTCGCGGCCGCCCGCCGGGAATAAAATTTAATTTCTCTCTAAGAG                                                                                                                | HA Tagging downstream target XmaI  |
| 01 3xHA tag WT R (P51)      | GTTGCGTGATAATTCATAATTACATGG                                                                                                                                     | Diagnostic primer WT               |
| 57 3xHA tag WT R (P52)      | GCCTTATGATGAATTAATTGTAAGTGCG                                                                                                                                    | Diagnostic primer WT               |
| 3xHA INT R (P53)            | GTATGCGTAATCTGGCACGTCGTATG                                                                                                                                      | Diagnostic primer HA tag           |

Where appropriate, target restriction sites are shown as underlined. The appropriate restriction enzyme is presented in the description column. F, forward; R, reverse; INT, integration; WT, wild-type; KO, knockout; UTR, untranslated region. All primers are listed in a 5' to 3' direction
